# Supplementary material
Source: MDPI journal article supplement (https://www.mdpi.com/2073-4433/12/6/792)
Supplement: s1 [file s1]

# Impacts of Climate Change on the Hydrometeorological Characteristics of the Soan River Basin, Pakistan

Muhammad Usman <sup>1,\*</sup>, Christopher E. Ndehedehe <sup>2,3</sup>, Rodrigo Manzanos <sup>4</sup>, Burhan Ahmad <sup>1</sup> and Oluwafemi E. Adeyeri <sup>5,6</sup>

<sup>1</sup> Research and Development Division, Pakistan Meteorological Department, Pitras Bukhari Road, H-8/2, Islamabad, 44000, Pakistan; burhanahmadkhan@gmail.com

<sup>2</sup> Australian Rivers Institute, Griffith University, Nathan, Queensland 4111, Australia; c.ndehedehe@griffith.edu.au

<sup>3</sup> School of Environment & Science, Griffith University, Nathan, Queensland 4111, Australia

<sup>4</sup> Meteorology Group, Dpto. de Matemática Aplicada y Ciencias de la Computación, Universidad de

Cantabria, 39005 Santander, Spain; rodrigo.manzanas@unican.es

<sup>5</sup> Department of Meteorology and Climate Science, Federal University of Technology, Akure, Nigeria; eoadeyeri@futa.edu.ng

<sup>6</sup> Institute for Meteorology and Climate Research, Karlsruhe Institute of Technology, Campus Alpine, Garmisch-Partenkirchen, Germany

\* Correspondence: [usman666.m@gmail.com](mailto:usman666.m@gmail.com)

Table S1. Model name, modeling group, and country of the GCMs used.

| Serial no | Model name | Modelling group                                                                                                        | Country   |
|-----------|------------|------------------------------------------------------------------------------------------------------------------------|-----------|
| 1         | ACCESS 1.0 | Commonwealth Scientific and Industrial Research Organization and Bureau of Meteorology                                 | Australia |
| 2         | BCC-CSM1-1 | Beijing Climate Center, China Meteorological Administration (BCC)                                                      | China     |
| 3         | BNU-ESM    | College of Global Change and Earth System Science, Beijing Normal University (GCESS)                                   | China     |
| 4         | CanESM2    | Canadian Centre for Climate Modelling and Analysis (CCCMA)                                                             | Canada    |
| 5         | CCSM4      | NCAR Community Climate System Model, (CCSM)                                                                            | USA       |
| 6         | CESM1-BGC  | Community Earth System Model Contributors                                                                              | USA       |
| 7         | CNRM-CM5   | Centre National de Recherches Météorologiques Centre Européen de Recherche et Formation Avancée en Calcul Scientifique | France    |

|    |                |                                                                                                         |           |
|----|----------------|---------------------------------------------------------------------------------------------------------|-----------|
| 8  | CSIRO-Mk3-6-0  | Commonwealth Scientific and Industrial Research Organization in collaboration with QCCCE (CSIRO-QCCCCE) | Australia |
| 9  | GFDL-CM3       | NOAA Geophysical Fluid Dynamics Laboratory (NOAA-GFDL)                                                  | USA       |
| 10 | GFDL-ESM2G     |                                                                                                         |           |
| 11 | GFDL-ESM2M     |                                                                                                         |           |
| 12 | INMCM4         | Institute for Numerical Mathematics (INM)                                                               | Russia    |
| 13 | IPSL-CM5A-LR   | Institut Pierre-Simon Laplace (IPSL)                                                                    | France    |
| 14 | IPSL-CM5A-MR   |                                                                                                         |           |
| 15 | MIROC5         | (The University of Tokyo), and National Institute for Environmental Studies (MIROC)                     | Japan     |
| 16 | MIROC-ESM      |                                                                                                         |           |
| 17 | MIROC-ESM-CHEM | Japan Agency for Marine-Earth Science and Technology, Atmosphere and Ocean Research Institute           | Japan     |
| 18 | MPI-ESM-LR     | Max-Planck-Institut für Meteorologie (MPI-M)                                                            | Germany   |
| 19 | MPI-ESM-MR     |                                                                                                         |           |
| 20 | MRI-CGCM3      | Meteorological Research Institute (MRI)                                                                 | Germany   |
| 21 | NorESM1-M      | Norwegian Climate Centre (NCC)                                                                          | Norway    |

Table S2. Precipitation values in mm at daily temporal scale and their differences to observed precipitation for the period 1980 to 2004 for Chirah sub catchment. *>1mm P days* = Average number of days in a year with precipitation > 1 mm; Ave. = average daily precipitation; Max. = maximum daily precipitation; SD = standard deviation. Differences are calculated by division ( $SD_{sim} / SD_{gauge}$ ) for SD and subtraction for the other parameters. Where  $SD_{sim}$  and  $SD_{gauge}$  are the standard deviations of the climate models' and gauge precipitations, respectively.

| Absolute values |     |    |             | Difference w.r.t observed values |     |    |             |
|-----------------|-----|----|-------------|----------------------------------|-----|----|-------------|
| Avg             | Max | SD | >1mm P days | Avg                              | Max | SD | >1mm P days |

|                |      |        |       |        |       |         |      |        |
|----------------|------|--------|-------|--------|-------|---------|------|--------|
| Obs            | 4.85 | 255.00 | 13.56 | 100.04 |       |         |      |        |
| NEX-GDDP GCMs  |      |        |       |        |       |         |      |        |
| ACCESS1-0      | 3.13 | 236.98 | 10.23 | 103.68 | -1.72 | -18.02  | 0.75 | 3.64   |
| bcc-csm1-1     | 3.00 | 170.99 | 8.21  | 132.52 | -1.85 | -84.01  | 0.61 | 32.48  |
| BNU-ESM        | 3.21 | 233.27 | 8.81  | 141.92 | -1.64 | -21.73  | 0.65 | 41.88  |
| CanESM2        | 2.97 | 113.13 | 7.29  | 139.04 | -1.88 | -141.87 | 0.54 | 39.00  |
| CCSM4          | 3.40 | 229.04 | 12.09 | 84.68  | -1.45 | -25.96  | 0.89 | -15.36 |
| CESM1-BGC      | 3.08 | 285.72 | 11.22 | 85.76  | -1.77 | 30.72   | 0.83 | -14.28 |
| CNRM-CM5       | 3.27 | 190.94 | 10.11 | 106.92 | -1.58 | -64.06  | 0.75 | 6.88   |
| CSIRO-Mk3-6-0  | 2.49 | 194.73 | 8.57  | 79.76  | -2.36 | -60.27  | 0.63 | -20.28 |
| GFDL-CM3       | 3.08 | 250.27 | 9.28  | 116.28 | -1.77 | -4.73   | 0.68 | 16.24  |
| GFDL-ESM2G     | 3.12 | 112.11 | 7.84  | 133.80 | -1.73 | -142.89 | 0.58 | 33.76  |
| GFDL-ESM2M     | 3.18 | 134.01 | 8.18  | 135.00 | -1.67 | -120.99 | 0.60 | 34.96  |
| inmcm4         | 2.99 | 214.57 | 9.70  | 100.48 | -1.86 | -40.43  | 0.72 | 0.44   |
| IPSL-CM5A-LR   | 3.19 | 150.46 | 8.70  | 124.96 | -1.66 | -104.54 | 0.64 | 24.92  |
| IPSL-CM5A-MR   | 3.05 | 202.12 | 9.22  | 107.92 | -1.80 | -52.88  | 0.68 | 7.88   |
| MIROC5         | 3.24 | 213.82 | 10.44 | 105.48 | -1.61 | -41.18  | 0.77 | 5.44   |
| MIROC-ESM      | 2.95 | 200.73 | 7.67  | 134.48 | -1.90 | -54.27  | 0.57 | 34.44  |
| MIROC-ESM-CHEM | 3.01 | 166.01 | 7.78  | 137.12 | -1.84 | -88.99  | 0.57 | 37.08  |
| MPI-ESM-LR     | 3.05 | 200.72 | 9.30  | 114.96 | -1.80 | -54.28  | 0.69 | 14.92  |
| MPI-ESM-MR     | 3.09 | 304.17 | 10.09 | 107.76 | -1.76 | 49.17   | 0.74 | 7.72   |
| MRI-CGCM3      | 3.35 | 352.76 | 11.55 | 102.56 | -1.50 | 97.76   | 0.85 | 2.52   |
| NorESM1-M      | 3.09 | 367.42 | 9.64  | 114.44 | -1.76 | 112.42  | 0.71 | 14.40  |

Table S3. Precipitation values in mm at daily temporal scale and their differences to observed precipitation for the period 1980 to 2004 for Dhoke Pathan sub catchment. *>Imm P days* = Average number of days in a year with precipitation > 1 mm; Ave. = average daily precipitation; Max. = maximum daily precipitation; SD = standard deviation. Differences are calculated by division ( $SD_{sim} / SD_{gauge}$ ) for SD and subtraction for the other

parameters. Where SD<sub>sim</sub> and SD<sub>gauge</sub> are the standard deviations of the climate models' and gauge precipitations, respectively.

|                | Absolute values |        |       |             | Difference w.r.t observed values |         |      |             |
|----------------|-----------------|--------|-------|-------------|----------------------------------|---------|------|-------------|
|                | Avg             | Max    | SD    | >1mm P days | Avg                              | Max     | SD   | >1mm P days |
| Obs            | 4.10            | 216.90 | 11.20 | 104.28      |                                  |         |      |             |
| NEX-GDDP GCMs  |                 |        |       |             |                                  |         |      |             |
| ACCESS1-0      | 2.99            | 242.69 | 9.77  | 100.64      | -1.11                            | 25.79   | 0.87 | -3.64       |
| bcc-csm1-1     | 2.89            | 166.72 | 7.91  | 130.48      | -1.21                            | -50.18  | 0.71 | 26.20       |
| BNU-ESM        | 3.11            | 218.31 | 8.50  | 139.68      | -0.99                            | 1.41    | 0.76 | 35.40       |
| CanESM2        | 2.86            | 110.62 | 7.01  | 136.12      | -1.24                            | -106.28 | 0.63 | 31.84       |
| CCSM4          | 3.24            | 229.33 | 11.43 | 84.84       | -0.86                            | 12.43   | 1.02 | -19.44      |
| CESM1-BGC      | 2.96            | 290.92 | 10.66 | 85.16       | -1.14                            | 74.02   | 0.95 | -19.12      |
| CNRM-CM5       | 3.14            | 175.82 | 9.64  | 104.32      | -0.96                            | -41.08  | 0.86 | 0.04        |
| CSIRO-Mk3-6-0  | 2.33            | 171.16 | 8.07  | 75.4        | -1.77                            | -45.74  | 0.72 | -28.88      |
| GFDL-CM3       | 3.00            | 220.31 | 8.94  | 114.84      | -1.10                            | 3.41    | 0.80 | 10.56       |
| GFDL-ESM2G     | 3.04            | 115.66 | 7.72  | 132.48      | -1.06                            | -101.24 | 0.69 | 28.20       |
| GFDL-ESM2M     | 3.08            | 137.91 | 7.95  | 133.44      | -1.02                            | -78.99  | 0.71 | 29.16       |
| inmcm4         | 2.90            | 212.45 | 9.42  | 100.28      | -1.20                            | -4.45   | 0.84 | -4.00       |
| IPSL-CM5A-LR   | 3.07            | 149.56 | 8.51  | 120.56      | -1.03                            | -67.34  | 0.76 | 16.28       |
| IPSL-CM5A-MR   | 2.93            | 189.84 | 8.85  | 106.12      | -1.17                            | -27.06  | 0.79 | 1.84        |
| MIROC5         | 3.13            | 207.37 | 10.02 | 102.68      | -0.97                            | -9.53   | 0.89 | -1.60       |
| MIROC-ESM      | 2.84            | 205.13 | 7.45  | 132.16      | -1.26                            | -11.77  | 0.66 | 27.88       |
| MIROC-ESM-CHEM | 2.93            | 151.37 | 7.61  | 134.72      | -1.17                            | -65.53  | 0.68 | 30.44       |
| MPI-ESM-LR     | 2.90            | 198.50 | 8.79  | 112.04      | -1.20                            | -18.40  | 0.78 | 7.76        |
| MPI-ESM-MR     | 2.93            | 203.99 | 9.34  | 105.68      | -1.17                            | -12.91  | 0.83 | 1.40        |
| MRI-CGCM3      | 3.20            | 257.34 | 10.79 | 100.48      | -0.90                            | 40.44   | 0.96 | -3.80       |
| NorESM1-M      | 2.97            | 313.94 | 9.11  | 111.08      | -1.13                            | 97.04   | 0.81 | 6.80        |

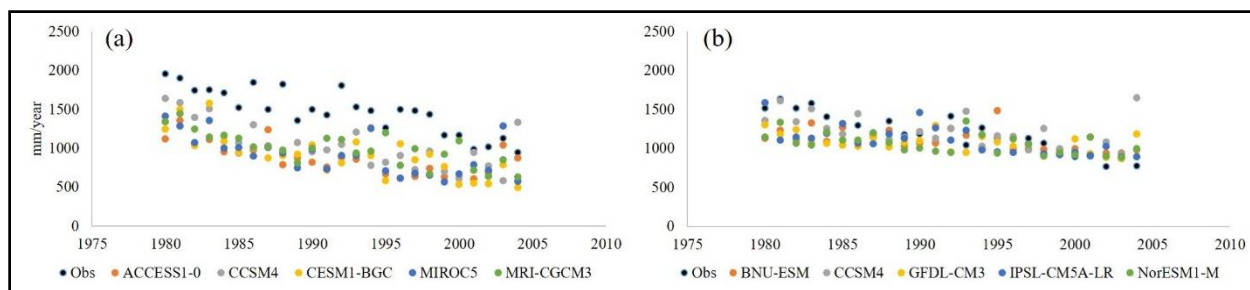

Figure S1. Interannual variability of streamflow in the historic period (1980-2004) characterized by selected GCMs for both catchments (a) Chirah and (b) Dhoke Pathan.

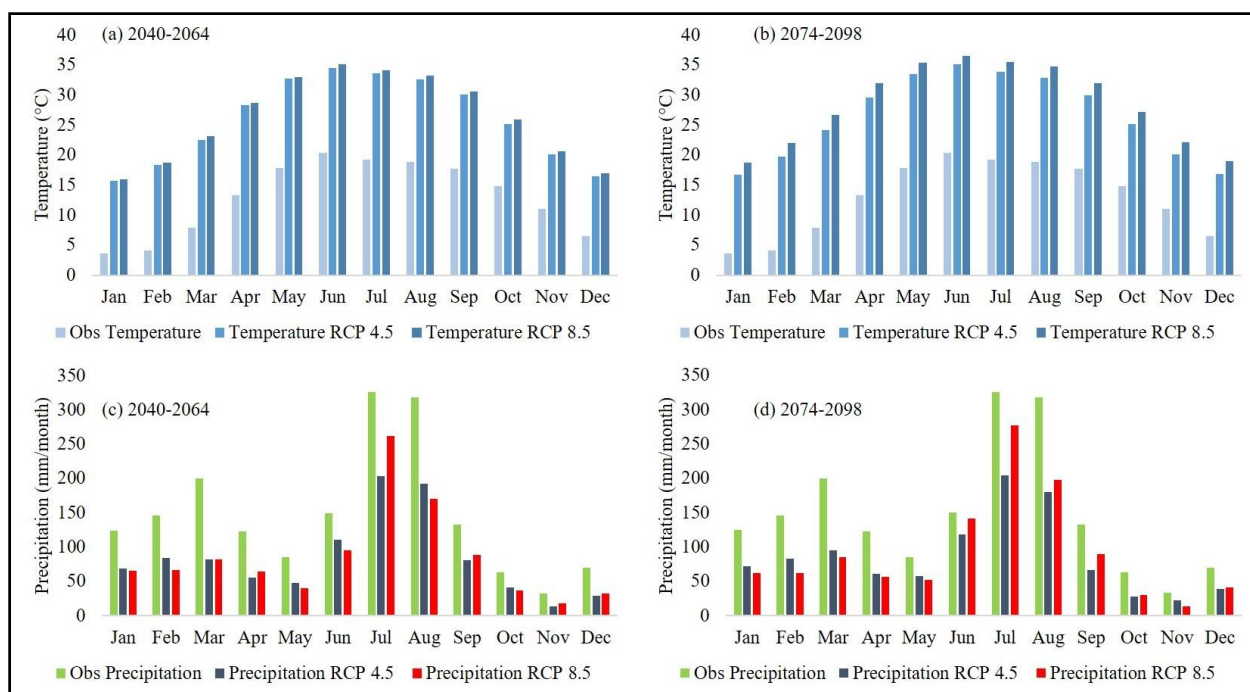

Figure S2. Average monthly temperature and precipitation projected with 5 models ensemble in the Chirah sub catchment under the RCP 4.5 and RCP 8.5 emission scenarios for two future periods. (a) temperature for (2040-2064), (b) temperature for (2074-2098), (c) precipitation for (2040-2064), d (precipitation for 2074-2098).

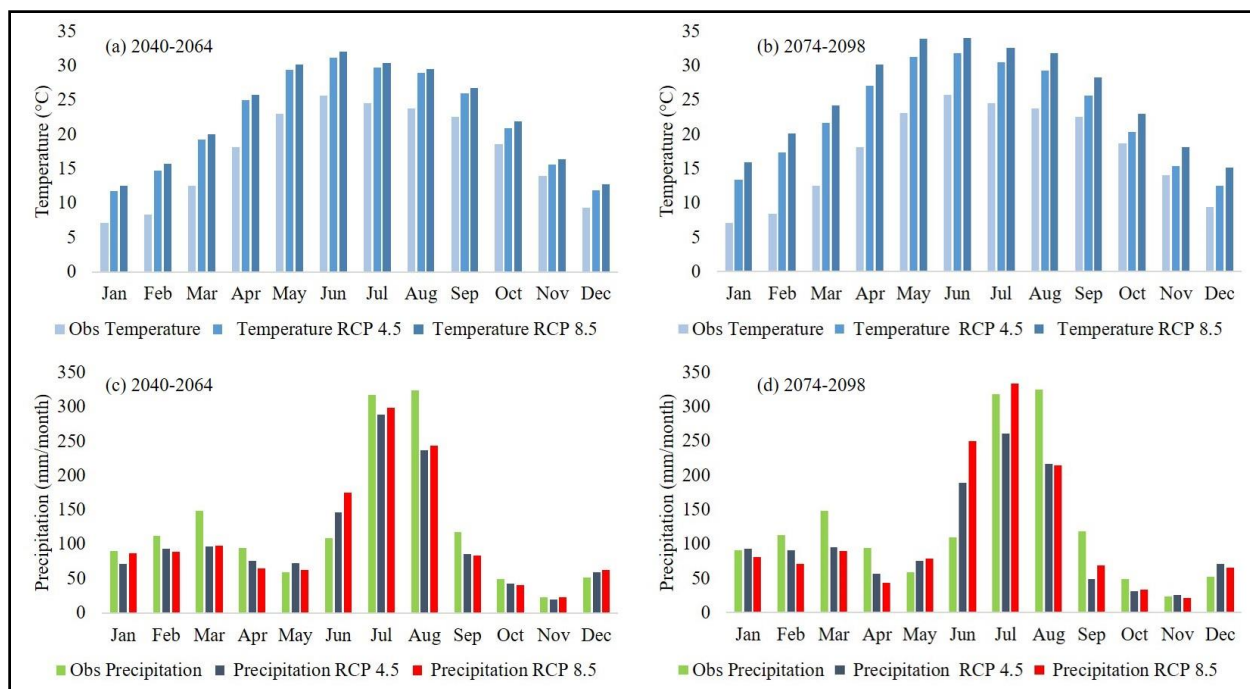

Figure S3. Average monthly temperature and precipitation projected with 5 models ensemble in the Dhoke Pathan sub catchment under the RCP 4.5 and RCP 8.5 emission scenarios for two future periods. (a) temperature for (2040-2064), (b) temperature for (2074-2098), (c) precipitation for (2040-2064), d (precipitation for 2074-2098).

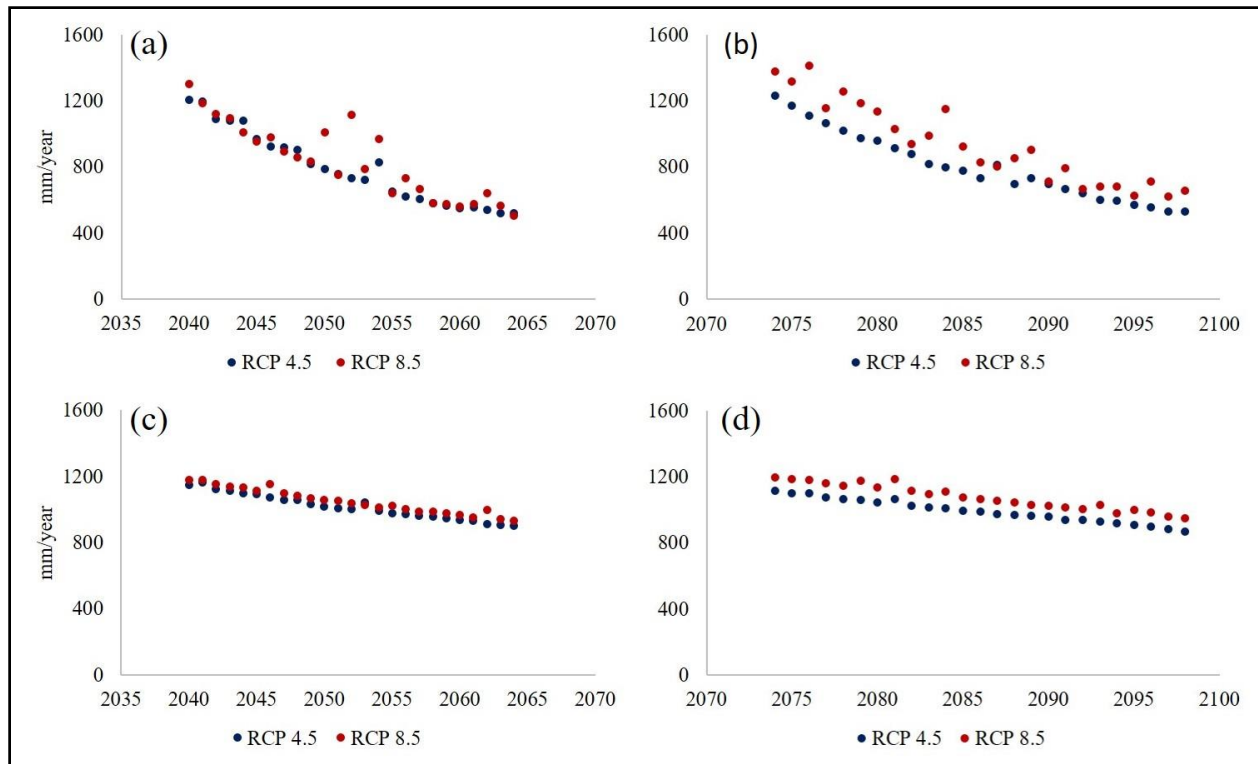

Figure S4. Interannual variability of streamflow in the future periods (2040-2064; (a) Chirah sub catchment and (c) Dhoke Pathan sub catchment and 2074-2098; (b) Chirah sub catchment and (d) Dhoke Pathan sub catchment) characterized by ensemble of selected GCMs.
